# Supplementary material for: Exploration of nitrogen use efficiency and root-shoot-soil variation on the stoichiometric characteristics of carbon, nitrogen, phosphorous and potassium for winter wheat under various nitrogen treatments
Source: PeerJ. 2025 Oct 3;13:e20101. doi: 10.7717/peerj.20101 (PMC12499561; doi:10.7717/peerj.20101)
Supplement: Supplemental Information 1 [file peerj-13-20101-s001.xlsx]

## Sheet: Yield and NUE
2020-2021	Yield	NUE
N0	7992	32.7204
N0	8510.62	33.8446
N0	8251.31	31.291
N180	8616.38	28.3787
N180	9188.72	29.6948
N180	9044.02	30.54
N300	8906.06	26.937
N300	9365.62	26.7695
N300	9021.38	27.2188
2021-2022
N0	6745.71	50.7853
N0	6968.67	52.2387
N0	6522.75	53.8041
N180	9582.89	42.4322
N180	10080.7	43.8573
N180	9831.8	41.036
N300	8908.59	40.1959
N300	9355.22	39.6199
N300	9131.91	39.0366

## Sheet: Soil
Anthesis stage(mg/g)	SOC	TN	TP	TK		Maturity stage(mg/g)	SOC	TN	TP	TK
N0	9.61437	0.688489	0.719942	5.8631		N0	8.44136	0.333057	0.527921	4.20972
N0	7.58934	0.634353	0.728698	5.21125		N0	7.9978	0.436104	0.521712	4.02387
N0	9.69557	0.580218	0.72432	5.5645		N0	8.88491	0.403299	0.53413	4.23677
N2	8.61886	0.592507	0.862377	5.41318		N2	8.4076	0.377985	0.610592	3.57592
N2	8.53894	0.592507	0.791113	4.22664		N2	9.32355	0.340789	0.599342	4.00378
N2	10.0494	0.592507	0.933641	4.339		N2	8.27289	0.372137	0.619275	4.08889
N4	9.26969	0.300554	0.90473	3.91608		N4	8.49801	0.328685	0.589641	3.72168
N4	8.11949	0.297411	1.07624	5.02463		N4	9.48584	0.377242	0.552863	4.14559
N4	6.93892	0.294267	0.79995	3.64804		N4	9.33485	0.425799	0.571252	4.15979

## Sheet: Plant
Root
Root N mg/g	Jointing stage	Anthesis stage	Filling stage	Maturity stage	mean	Root P mg/g	Jointing stage	Anthesis stage	Filling stage	Maturity stage	mean	Root K mg/g	Jointing stage	Anthesis stage	Filling stage	Maturity stage	mean	Root C mg/g	Jointing stage	Anthesis stage	Filling stage	Maturity stage	mean
N0	6.06437	3.58005	5.91829	4.31657	4.96982	N0	1.5137	1.38183	1.23468	1.22502	1.33881	N0	5.10913	3.73669	3.36607	2.79947	3.75284	N0	404.637	473.113	427.112	443.45	437.078
N0	4.69388	3.72403	6.37859	5.13103	4.98188	N0	1.43814	1.33766	1.59988	1.50387	1.46989	N0	4.3698	4.44926	2.58915	2.46277	3.46774	N0	411.327	450.551	431.98	436.977	432.709
N0	5.37912	3.65204	5.45798	4.54662	4.75894	N0	1.47592	1.35975	1.41728	1.36444	1.40435	N0	4.73947	4.09297	2.97761	2.63112	3.61029	N0	407.982	461.832	429.546	427.146	431.627
N2	7.17752	5.29524	7.27788	6.34528	6.52398	N2	1.61558	1.4324	1.54694	1.45928	1.51355	N2	3.63185	2.24095	4.30908	2.31453	3.1241	N2	438.394	422.722	503.475	446.386	452.744
N2	6.56018	4.75111	7.3392	6.9553	6.40145	N2	1.60038	1.59587	1.38813	1.40625	1.49766	N2	3.15025	2.6685	3.9802	2.63711	3.10901	N2	427.437	443.422	448.101	427.416	436.594
N2	5.94283	4.20699	7.30854	7.56532	6.25592	N2	1.60798	1.26893	1.34859	1.33907	1.39114	N2	3.39105	2.45473	4.63797	2.91641	3.35004	N2	432.916	433.072	431.156	433.113	432.564
N4	5.49413	4.47451	7.64123	6.26633	5.96905	N4	1.69661	1.58801	1.39057	1.38842	1.5159	N4	4.06465	2.76087	2.22164	2.34809	2.84881	N4	415.982	408.543	393.353	450.813	417.173
N4	5.58805	4.05125	6.78241	5.61567	5.50934	N4	1.37421	1.68896	1.28295	1.34211	1.42206	N4	3.82114	2.76087	2.42237	3.17494	3.04483	N4	434.793	420.12	475.643	458.312	447.217
N4	5.54109	4.89777	7.21182	5.6962	5.83672	N4	1.53541	1.63849	1.49819	1.2958	1.49197	N4	3.94289	2.76087	2.0209	2.76151	2.87155	N4	425.388	414.332	433.347	438.91	427.994
Stems and leaves
Stems and leaves N mg/g	Jointing stage	Anthesis stage	Filling stage	Maturity stage	mean	Stems and leaves P mg/g	Jointing stage	Anthesis stage	Filling stage	Maturity stage	mean	Stems and leaves K mg/g	Jointing stage	Anthesis stage	Filling stage	Maturity stage	mean	Stems and leaves C mg/g	Jointing stage	Anthesis stage	Filling stage	Maturity stage	mean
N0	26.864	12.467	10.152	5.079	13.6405	N0	3.42522	2.287	1.84242	1.14596	2.17515	N0	37.3061	20.1759	24.6674	25.8727	27.0055	N0	438.18	402.434	417.857	401.839	415.077
N0	24.422	11.81	10.466	4.197	12.7238	N0	3.41316	2.23233	1.98418	1.27716	2.2267	N0	38.3435	20.5277	23.9727	27.3984	27.5606	N0	450.665	388.7	418.729	408.003	416.524
N0	22.914	14.738	11.093	4.242	13.2468	N0	2.87462	2.32859	2.10709	1.0847	2.09875	N0	36.7407	23.3475	27.4948	24.347	27.9825	N0	421.897	389.934	421.84	406.062	409.933
N2	29.882	15.604	13.61	4.653	15.9372	N2	2.80659	2.51966	1.82531	0.90209	2.01341	N2	43.4552	22.1502	32.0619	27.1129	31.1951	N2	439.412	427.737	397.906	422.626	421.92
N2	30.614	16.986	12.863	4.929	16.348	N2	3.34968	2.57003	1.81242	1.0118	2.18598	N2	44.9382	25.3308	27.3984	26.2858	30.9883	N2	431.254	399.063	439.403	399.207	417.232
N2	29.792	15.888	15.895	4.743	16.5795	N2	3.07568	2.53368	1.83819	0.982931	2.10762	N2	39.1942	23.1163	33.8967	27.3984	30.9014	N2	423.095	399.215	413.491	389.374	406.294
N4	28.1755	17.643	12.281	5.997	16.0241	N4	3.35052	2.46596	1.84963	1.35267	2.2547	N4	33.9482	32.6988	24.9137	33.4092	31.2425	N4	457.108	431.612	413.641	430.097	433.115
N4	28.62	17.942	13.939	5.878	16.5947	N4	3.09342	2.18578	1.85127	1.2204	2.08772	N4	38.3405	25.559	33.3486	29.0165	31.5662	N4	440.176	431.258	392.767	413.74	419.485
N4	27.731	18.412	12.781	6.117	16.2602	N4	3.22197	2.74614	2.12798	1.08813	2.29605	N4	44.719	24.5008	31.1096	24.6239	31.2383	N4	448.642	431.435	382.282	431.832	423.548
Grain
Grain N mg/g	Filling stage	Maturity stage	mean	Grain P mg/g	Filling stage	Maturity stage	mean	Grain K mg/g	Filling stage	Maturity stage	mean	Grain C mg/g	Filling stage	Maturity stage	mean
N0	15.7956	21.3694	18.5825	N0	4.16806	4.25746	4.21276	N0	49.1176	10.1942	29.6559	N0	456.744	429.381	443.063
N0	18.7696	20.6325	19.701	N0	4.01625	3.63556	3.8259	N0	49.1176	9.94311	29.5304	N0	448.905	441.895	445.4
N0	18.3541	19.8955	19.1248	N0	4.13558	4.18234	4.15896	N0	49.1176	7.83827	28.4779	N0	451.773	435.638	443.706
N2	16.3016	23.8544	20.078	N2	3.70401	3.75741	3.73071	N2	51.848	7.98296	29.9155	N2	452.65	443.162	447.906
N2	18.0536	33.0421	25.5479	N2	4.29559	4.03044	4.16302	N2	46.9553	8.12867	27.542	N2	454.854	455.77	455.312
N2	19.8057	28.4483	24.127	N2	3.88342	3.7698	3.82661	N2	45.3881	7.49768	26.4429	N2	456.782	457.134	456.958
N4	18.9079	24.5757	21.7418	N4	4.08233	4.22906	4.1557	N4	52.064	9.50478	30.7844	N4	428.559	441.648	435.103
N4	21.3093	22.0794	21.6943	N4	3.70203	3.76185	3.73194	N4	50.3014	7.62308	28.9622	N4	437.117	451.356	444.236
N4	19.3902	25.555	22.4726	N4	4.46468	3.48599	3.97534	N4	46.1947	7.56042	26.8776	N4	474.119	448.916	461.518

## Sheet: Temperature and rainfall
GST	Month	Mean.Temperature..F.
2020-10-01	October	21.48
2020-10-02	October	18.29
2020-10-03	October	17.99
2020-10-04	October	14.65
2020-10-05	October	13.28
2020-10-06	October	14.18
2020-10-07	October	15.8
2020-10-08	October	16.16
2020-10-09	October	17.8
2020-10-10	October	18.12
2020-10-11	October	18.05
2020-10-12	October	16.96
2020-10-13	October	15.83
2020-10-14	October	13.4
2020-10-15	October	13.08
2020-10-16	October	14.18
2020-10-17	October	14.1
2020-10-18	October	15.33
2020-10-19	October	15.48
2020-10-20	October	15.17
2020-10-21	October	15.78
2020-10-22	October	13.41
2020-10-23	October	10.9
2020-10-24	October	11.87
2020-10-25	October	15.24
2020-10-26	October	18.58
2020-10-27	October	14.23
2020-10-28	October	13.32
2020-10-29	October	13.96
2020-10-30	October	13.51
2020-10-31	October	16.19
2020-11-01	November	14.64
2020-11-02	November	12.84
2020-11-03	November	9.99
2020-11-04	November	11.69
2020-11-05	November	13.84
2020-11-06	November	14.8
2020-11-07	November	13.72
2020-11-08	November	11.26
2020-11-09	November	12.62
2020-11-10	November	12.62
2020-11-11	November	12.87
2020-11-12	November	14.91
2020-11-13	November	12.56
2020-11-14	November	12.6
2020-11-15	November	11.88
2020-11-16	November	13.77
2020-11-17	November	12.65
2020-11-18	November	12.96
2020-11-19	November	9.46
2020-11-20	November	7.11
2020-11-21	November	4.94
2020-11-22	November	3.73
2020-11-23	November	2
2020-11-24	November	2.62
2020-11-25	November	4.33
2020-11-26	November	4.55
2020-11-27	November	4.01
2020-11-28	November	2.21
2020-11-29	November	2.76
2020-11-30	November	0.03
2020-12-01	December	0.3
2020-12-02	December	-0.35
2020-12-03	December	0.17
2020-12-04	December	2.01
2020-12-05	December	2.73
2020-12-06	December	3.98
2020-12-07	December	1.3
2020-12-08	December	0.83
2020-12-09	December	3.59
2020-12-10	December	4.62
2020-12-11	December	3.3
2020-12-12	December	4.19
2020-12-13	December	-0.04
2020-12-14	December	-2.54
2020-12-15	December	-0.5
2020-12-16	December	-0.54
2020-12-17	December	0.85
2020-12-18	December	0.47
2020-12-19	December	-0.06
2020-12-20	December	0.58
2020-12-21	December	1.62
2020-12-22	December	4.06
2020-12-23	December	4.92
2020-12-24	December	4.14
2020-12-25	December	4.18
2020-12-26	December	5.43
2020-12-27	December	5.36
2020-12-28	December	2.67
2020-12-29	December	-2.54
2020-12-30	December	-4.56
2020-12-31	December	-3.13
2021-01-01	January	-1.1
2021-01-02	January	0.95
2021-01-03	January	-0.49
2021-01-04	January	-1.18
2021-01-05	January	-1.99
2021-01-06	January	-4.42
2021-01-07	January	-8.11
2021-01-08	January	-4.92
2021-01-09	January	-3.02
2021-01-10	January	-0.24
2021-01-11	January	-0.76
2021-01-12	January	1.12
2021-01-13	January	5
2021-01-14	January	5.23
2021-01-15	January	2.21
2021-01-16	January	0.49
2021-01-17	January	0.21
2021-01-18	January	2.57
2021-01-19	January	0.61
2021-01-20	January	0.92
2021-01-21	January	2.72
2021-01-22	January	2.75
2021-01-23	January	3.34
2021-01-24	January	3.13
2021-01-25	January	4.07
2021-01-26	January	4.93
2021-01-27	January	4.8
2021-01-28	January	2.58
2021-01-29	January	4.74
2021-01-30	January	6.25
2021-01-31	January	6.69
2021-02-01	February	6.55
2021-02-02	February	2.49
2021-02-03	February	6.12
2021-02-04	February	5.09
2021-02-05	February	9.11
2021-02-06	February	9.27
2021-02-07	February	5.57
2021-02-08	February	3.3
2021-02-09	February	4.31
2021-02-10	February	7.82
2021-02-11	February	9.57
2021-02-12	February	10.17
2021-02-13	February	8.98
2021-02-14	February	10.97
2021-02-15	February	5.15
2021-02-16	February	5.98
2021-02-17	February	2.48
2021-02-18	February	6.49
2021-02-19	February	11.42
2021-02-20	February	12.31
2021-02-21	February	16.26
2021-02-22	February	11.88
2021-02-23	February	8.7
2021-02-24	February	3.61
2021-02-25	February	1.58
2021-02-26	February	3.19
2021-02-27	February	5.87
2021-02-28	February	7.55
2021-03-01	March	4.21
2021-03-02	March	6.43
2021-03-03	March	9.66
2021-03-04	March	12.27
2021-03-05	March	12.62
2021-03-06	March	2.5
2021-03-07	March	4.37
2021-03-08	March	6.97
2021-03-09	March	9.18
2021-03-10	March	9.93
2021-03-11	March	10.92
2021-03-12	March	10.73
2021-03-13	March	11.11
2021-03-14	March	12.19
2021-03-15	March	15.15
2021-03-16	March	9.63
2021-03-17	March	10.64
2021-03-18	March	9.77
2021-03-19	March	7.94
2021-03-20	March	8.84
2021-03-21	March	8.61
2021-03-22	March	9.78
2021-03-23	March	11.67
2021-03-24	March	13.41
2021-03-25	March	14.37
2021-03-26	March	13.47
2021-03-27	March	15.36
2021-03-28	March	17.37
2021-03-29	March	14.65
2021-03-30	March	14.28
2021-03-31	March	14.42
2021-04-01	April	13.8
2021-04-02	April	12.48
2021-04-03	April	10.85
2021-04-04	April	11.98
2021-04-05	April	12.27
2021-04-06	April	13.83
2021-04-07	April	14.55
2021-04-08	April	14.83
2021-04-09	April	14.64
2021-04-10	April	15.13
2021-04-11	April	15.23
2021-04-12	April	18.83
2021-04-13	April	15.05
2021-04-14	April	15.57
2021-04-15	April	17.8
2021-04-16	April	16.47
2021-04-17	April	14.73
2021-04-18	April	15.93
2021-04-19	April	18.58
2021-04-20	April	16.07
2021-04-21	April	14.8
2021-04-22	April	16.9
2021-04-23	April	16.26
2021-04-24	April	14.15
2021-04-25	April	16.12
2021-04-26	April	17.56
2021-04-27	April	20.21
2021-04-28	April	19.12
2021-04-29	April	20.8
2021-04-30	April	20.73
2021-05-01	May	19.61
2021-05-02	May	16.35
2021-05-03	May	16.23
2021-05-04	May	19.65
2021-05-05	May	20.28
2021-05-06	May	23.95
2021-05-07	May	21.76
2021-05-08	May	25.43
2021-05-09	May	24.38
2021-05-10	May	23.46
2021-05-11	May	21.35
2021-05-12	May	23.89
2021-05-13	May	24.2
2021-05-14	May	24.76
2021-05-15	May	21.8
2021-05-16	May	17.62
2021-05-17	May	19.05
2021-05-18	May	22.36
2021-05-19	May	20.95
2021-05-20	May	22.83
2021-05-21	May	24.59
2021-05-22	May	26.15
2021-05-23	May	23.24
2021-05-24	May	25.16
2021-05-25	May	22.85
2021-05-26	May	25.92
2021-05-27	May	27.98
2021-05-28	May	26.52
2021-05-29	May	28.62
2021-05-30	May	27
2021-05-31	May	29.24
2021-06-01	June	24.45
2021-06-02	June	29.19
2021-06-03	June	23.77
2021-06-04	June	26.48
2021-06-05	June	29.55
2021-06-06	June	30.47
2021-06-07	June	31.2
2021-06-08	June	28.62
2021-06-09	June	28.39
2021-06-10	June	26.81
2021-06-11	June	29.8
2021-06-12	June	30.19
2021-06-13	June	28.62
2021-06-14	June	28.72
2021-06-15	June	29.07
2021-06-16	June	27.33
2021-06-17	June	26.01
2021-06-18	June	26.69
2021-06-19	June	28.83
2021-06-20	June	30.15
2021-06-21	June	31.23
2021-06-22	June	30.51
2021-06-23	June	30.27
2021-06-24	June	30.45
2021-06-25	June	29.34
2021-06-26	June	30.28
2021-06-27	June	30.94
2021-06-28	June	33.5
2021-06-29	June	31.92
2021-06-30	June	33.11
